# Supplementary material for: The glycolytic enzyme, phosphoglycerate mutase, has critical roles in stomatal movement, vegetative growth, and pollen production in Arabidopsis thaliana
Source: PubMed Central journal article supplement — J Exp Bot. 2011 Aug 3;62(14):5179–89. doi: 10.1093/jxb/err223 (PMC3193020; doi:10.1093/jxb/err223), 2011-08-03
Supplement: supp_err223_00063156_file001.pdf [file supp_err223_00063156_file001.pdf]

**The glycolytic enzyme, phosphoglycerate mutase, has critical roles in stomatal movement, vegetative growth, and pollen production in *Arabidopsis thaliana***

Zhixin Zhao and Sarah M. Assmann

Supplemental Data

Table S1 Primer information.

| Name             | Primer sequence             |
|------------------|-----------------------------|
| iPGM1-1 LP       | ATGTTCTATCAATCTCCGGGG       |
| iPGM1-1 RP       | TTGATGCTTTTTGGATTCATTG      |
| iPGM1-2 LP       | TCGCATTAATAATTATCACTCTTGTG  |
| iPGM1-2 RP       | AGAACCATCCAAAACATCACG       |
| iPGM2-1 LP       | GAGGTAGGCAATGCTTGTGAG       |
| iPGM2-1 RP       | TTACCTGGTCAAACCTGCCAC       |
| iPGM2-2 LP       | ATTGTCTGCAAACCAGGACAC       |
| iPGM2-2 RP       | GGTCCAATTGTTGATGGTGAC       |
| LBb1             | GCGTGGACCGCTTGCTGCAACT      |
| RB1              | ATTAAACTCCAGAAACCCGCGGCTGAG |
| RT iPGM1 LP (p1) | ATGGCTACCTCCTCCGCTTGG       |
| RT iPGM1 RP (p2) | CTACTCCACTACTTCAATCAGGGT    |
| RT iPGM1 RP (p3) | GTGGATACAGTTGTACTGATCAGG    |
| RT iPGM1 RP (p4) | GAACTCCACCGTCACTGAGAAGTC    |
| RT iPGM2 LP (p5) | ATGGGTAGCTCCGGCGACGTTAAC    |
| RT iPGM2 RP (p6) | TCACTTCTCGACGACTTC          |
| RT iPGM2 RP (p7) | CGAACGCCATTGTGTGCCAGAT      |

Table S2 Genes involved in photosynthesis in Arabidopsis

Proteins in bold were identified in Zhao et al., 2008. Plant Cell. 20: 3210-32226

Proteins in italics were identified in Zhao et al., 2010 J. Proteome Res. 9: 1637–1647

Gene list was downloaded from KEGG

([http://www.genome.jp/kegg-bin/show\\_pathway?org\\_name=ath&mapno=00195&mapscale=&show\\_description=hide](http://www.genome.jp/kegg-bin/show_pathway?org_name=ath&mapno=00195&mapscale=&show_description=hide))

Gene name and description were downloaded from TAIR (<http://www.arabidopsis.org/>).

| Photosynthesis Name | Description                                                                                    |
|---------------------|------------------------------------------------------------------------------------------------|
| <b>ATCG00120</b>    | ATPA the ATPase alpha subunit                                                                  |
| AT4G04640           | ATPC1 One of two genes encoding the gamma subunit of Arabidopsis chloroplast ATP synthase      |
| AT1G15700           | ATPC2 One of two genes that encode the gamma subunit of Arabidopsis chloroplast ATP synthase   |
| AT4G09650           | ATPD the chloroplast ATPase delta-subunit                                                      |
| ATCG00470           | ATPE ATPase epsilon subunit                                                                    |
| <b>ATCG00130</b>    | ATPF ATPase F subunit                                                                          |
| ATCG00140           | ATPH ATPase III subunit                                                                        |
| ATCG00150           | ATPI a subunit of ATPase complex CF0                                                           |
| <b>AT1G20340</b>    | DRT112 recombination and DNA-damage resistance protein (DRT112)                                |
| AT1G10960           | FD1 ferredoxin 1 (FD1)                                                                         |
| AT2G27510           | FD3 ferredoxin 3 (FD3)                                                                         |
| AT5G10000           | FD4 ferredoxin 4 (FD4)                                                                         |
| AT1G32550           | FdC1 FdC1, a ferredoxin protein capable of alternative electron partitioning                   |
| AT4G14890           | FdC2 2Fe-2S ferredoxin-like superfamily protein                                                |
| AT1G60950           | FED A a major leaf ferredoxin                                                                  |
| <b>AT5G66190</b>    | FNR1 a leaf-type ferredoxin:NADP(H) oxidoreductase                                             |
| <b>AT1G20020</b>    | FNR2 a leaf-type ferredoxin:NADP(H) oxidoreductase                                             |
| <b>AT1G44575</b>    | NPQ4 PSII-S (CP22)                                                                             |
| <b>ATMG00480</b>    | ORFB subunit 8 of the mitochondrial F(O) ATP synthase complex                                  |
| <b>ATCG00480</b>    | PB chloroplast-encoded gene for beta subunit of ATP synthase                                   |
| <b>ATCG00540</b>    | PETA cytochrome f apoprotein                                                                   |
| <b>ATCG00720</b>    | PETB the cytochrome b(6) subunit of the cytochrome b6f complex                                 |
| <b>AT4G03280</b>    | PETC the Rieske FeS center of cytochrome b6f complex                                           |
| <b>ATCG00730</b>    | PETD A chloroplast gene encoding subunit IV of the cytochrome b6/f complex                     |
| <b>AT1G76100</b>    | PETE1 One of two Arabidopsis plastocyanin genes                                                |
| ATCG00600           | PETG Cytochrome b6-f complex, subunit V                                                        |
| AT3G55330           | PPL1 PsbP-like protein 1 (PPL1)                                                                |
| AT3G01440           | PQL1 a subunit of the NAD(P)H complex located in the chloroplast thylakoid lumen               |
| AT1G14150           | PQL2 a subunit of the NAD(P)H dehydrogenase complex located in the chloroplast thylakoid lumen |
| <b>ATCG00350</b>    | PSAA psaA protein comprising the reaction center for photosystem I along with psaB protein     |
| <b>ATCG00340</b>    | PSAB the D1 subunit of photosystem I and II reaction centers                                   |

**ATCG01060** PSAC the PsaC subunit of photosystem I  
**AT4G02770** PSAD-1 a protein predicted by sequence similarity with spinach PsaD to be photosystem I reaction center subunit II (PsaD1)  
AT1G03130 PSAD-2 a protein predicted by sequence similarity with spinach PsaD to be photosystem I reaction center subunit II (PsaD2)  
**AT4G28750** PSAE-1 mutant has Decreased effective quantum yield of photosystem II  
**AT2G20260** PSAE-2 subunit E of photosystem I  
**AT1G31330** PSAF subunit F of photosystem I  
**AT1G55670** PSAG subunit G of photosystem I  
AT3G16140 PSAH-1 subunit H of photosystem I reaction center subunit VI  
AT1G52230 PSAH2 photosystem I subunit H2 (PSAH2)  
ATCG00510 PSAI subunit I of photosystem I  
ATCG00630 PSAJ subunit J of photosystem I  
**AT1G30380** PSAK subunit K of photosystem I reaction center  
**AT4G12800** PSAL subunit L of photosystem I reaction center  
AT5G64040 PSAN the only subunit of photosystem I located entirely in the thylakoid lumen  
AT1G08380 PSAO subunit O of photosystem I  
AT1G03600 PSB27 PSB27  
**ATCG00020** PSBA chlorophyll binding protein D1, a part of the photosystem II reaction center core  
**ATCG00680** PSBB for CP47, subunit of the photosystem II reaction center  
**ATCG00280** PSBC chloroplast gene encoding a CP43 subunit of the photosystem II reaction center  
**ATCG00270** PSBD PSII D2 protein  
**ATCG00580** PSBE PSII cytochrome b559  
ATCG00570 PSBF PSII cytochrome b559  
ATCG00710 PSBH a 8 kD phosphoprotein that is a component of the photosystem II oxygen evolving core  
ATCG00080 PSBI PSII I protein  
ATCG00550 PSBJ PSII component  
ATCG00070 PSBK PSII K protein  
ATCG00560 PSBL PSII L protein  
ATCG00220 PSBM PSII low MW protein  
**AT5G66570** PSBO1 a protein which is an extrinsic subunit of photosystem II  
**AT3G50820** PSBO2 a protein which is an extrinsic subunit of photosystem II  
**AT1G06680** PSBP-1 a 23 kD extrinsic protein that is part of photosystem II  
**AT2G30790** PSBP-2 a 23 kD extrinsic protein that is part of photosystem II  
AT4G05180 PSBQ-2 the PsbQ subunit of the oxygen evolving complex of photosystem II  
**AT4G21280** PSBQA the PsbQ subunit of the oxygen evolving complex of photosystem II  
**AT1G79040** PSBR for the 10 kDa PsbR subunit of photosystem II (PSII)  
ATCG00690 PSBT photosystem II 5 kD protein subunit PSII-T  
AT2G30570 PSBW a protein similar to photosystem II reaction center subunit W  
AT1G67740 PSBY PsbY precursor (psbY) mRNA  
AT4G05390 RFNR1 a root-type ferredoxin:NADP(H) oxidoreductase  
**AT1G30510** RFNR2 a root-type ferredoxin:NADP(H) oxidoreductase

|           |      |                                                           |
|-----------|------|-----------------------------------------------------------|
| ATCG00210 | YCF6 | hypothetical protein                                      |
| ATCG00300 | YCF9 | PsbZ, which is a subunit of photosystem II                |
| AT2G07707 |      | Plant mitochondrial ATPase, F0 complex, subunit 8 protein |
| AT4G28660 |      | Similar to PsbW subunit of photosystem II                 |
| AT4G32260 |      | ATPase, F0 complex, subunit B/B', bacterial/chloroplast   |
| AT5G45040 |      | Cytochrome c                                              |

Table S3 Genes involved in oxidative phosphorylation in Arabidopsis

Proteins in bold were identified in Zhao et al., 2008. Plant Cell. 20: 3210-32226

Proteins in italics were identified in Zhao et al., 2010 J. Proteome Res. 9: 1637–1647

Gene list was downloaded from KEGG

([http://www.genome.jp/kegg-bin/show\\_pathway?org\\_name=ath&mapno=00190&mapscale=&show\\_description=hide](http://www.genome.jp/kegg-bin/show_pathway?org_name=ath&mapno=00190&mapscale=&show_description=hide))

Gene name and description were downloaded from TAIR (<http://www.arabidopsis.org/>).

| Oxidative Phos   | Name    | Description                                                                                                 |
|------------------|---------|-------------------------------------------------------------------------------------------------------------|
| AT1G17260        | AHA10   | belongs to H <sup>+</sup> -APTase gene family                                                               |
| <b>ATMG01190</b> | ATP1    | ATPase subunit 1                                                                                            |
| <b>AT2G33040</b> | ATP3    | gamma subunit of Mt ATP synthase (ATP3)                                                                     |
| AT5G13450        | ATP5    | delta subunit of Mt ATP synthase (ATP5)                                                                     |
| ATMG00410        | ATP6-1  | ATPase subunit 6                                                                                            |
| ATMG01170        | ATP6-2  | ATPase subunit 6                                                                                            |
| ATMG01080        | ATP9    | subunit 9 of mitochondrial F <sub>0</sub> -ATPase                                                           |
| <b>ATCG00120</b> | ATPA    | the ATPase alpha subunit                                                                                    |
| AT4G04640        | ATPC1   | One of two genes (with ATPC2) encoding the gamma subunit of Arabidopsis chloroplast ATP synthase            |
| AT1G15700        | ATPC2   | One of two genes that encode the gamma subunit of Arabidopsis chloroplast ATP synthase                      |
| AT4G09650        | ATPD    | the chloroplast ATPase delta-subunit                                                                        |
| ATCG00470        | ATPE    | ATPase epsilon subunit                                                                                      |
| <b>ATCG00130</b> | ATPF    | ATPase F subunit                                                                                            |
| ATCG00140        | ATPH    | ATPase III subunit                                                                                          |
| ATCG00150        | ATPI    | a subunit of ATPase complex CF <sub>0</sub>                                                                 |
| AT3G52300        | ATPQ    | ATP synthase D chain, mitochondrial (ATPQ)                                                                  |
| AT4G34720        | AVA-P1  | vacuolar H <sup>+</sup> -pumping ATPase 16 kDa proteolipid (ava-p1)                                         |
| AT1G19910        | AVA-P2  | vacuolar H <sup>+</sup> -pumping ATPase 16 kDa proteolipid (ava-p2)                                         |
| <b>AT1G15690</b> | AVP1    | a H <sup>+</sup> -translocating (pyrophosphate-energized) inorganic pyrophosphatase (H <sup>+</sup> )-PPase |
| <b>AT5G08530</b> | CI51    | 51 kDa subunit of complex I (CI51)                                                                          |
| ATMG00220        | COB     | Mitochondrial apocytochrome b (cob) gene a subunit of the ubiquinol-cytochrome c oxidoreductase             |
| <i>ATMG01360</i> | COX1    | cytochrome c oxidase subunit 1                                                                              |
| AT2G44520        | COX10   | cytochrome c oxidase 10 (COX10)                                                                             |
| AT5G56090        | COX15   | a homolog of COX15                                                                                          |
| AT3G15352        | COX17   | protein similar to yeast COX17                                                                              |
| <b>ATMG00160</b> | COX2    | cytochrome c oxidase subunit 2                                                                              |
| ATMG00730        | COX3    | cytochrome c oxidase subunit 3                                                                              |
| AT1G22450        | COX6B   | subunit 6b of cytochrome c oxidase                                                                          |
| AT1G12840        | DET3    | subunit C of the vacuolar H <sup>+</sup> -ATPase (V-ATPase)                                                 |
| <b>AT5G37510</b> | EMB1467 | a subunit of the 400 kDa subcomplex of the mitochondrial NADH dehydrogenase (complex I)                     |
| <b>AT5G67590</b> | FRO1    | Mutant leaves have a reduced capacity for cold acclimation                                                  |

|                  |         |                                                                                                                  |
|------------------|---------|------------------------------------------------------------------------------------------------------------------|
| <b>AT2G18960</b> | HA1     | a plasma membrane proton ATPase                                                                                  |
| <b>AT5G62670</b> | HA11    | H(+)-ATPase 11 (HA11)                                                                                            |
| <b>AT5G57350</b> | HA3     | member of Plasma membrane H <sup>+</sup> -ATPase family                                                          |
| <b>AT3G47950</b> | HA4     | mutant has Slight reduction in root and shoot growth                                                             |
| <b>AT2G24520</b> | HA5     | H(+)-ATPase 5 (HA5)                                                                                              |
| AT2G07560        | HA6     | H(+)-ATPase 6 (HA6)                                                                                              |
| AT3G60330        | HA7     | H(+)-ATPase 7 (HA7)                                                                                              |
| AT3G42640        | HA8     | H(+)-ATPase 8 (HA8)                                                                                              |
| <b>AT1G80660</b> | HA9     | H(+)-ATPase 9 (HA9)                                                                                              |
| AT1G04630        | MEE4    | maternal effect embryo arrest 4 (MEE4)                                                                           |
| AT2G44620        | MTACP-1 | a member of the mitochondrial acyl carrier protein (ACP) family                                                  |
| AT1G65290        | mtACP2  | a member of the mitochondrial acyl carrier protein (ACP) family                                                  |
| ATMG00990        | NAD3    | NADH dehydrogenase subunit 3                                                                                     |
| ATMG00580        | NAD4    | NADH dehydrogenase subunit 4                                                                                     |
| ATMG00650        | NAD4L   | NADH dehydrogenase subunit 4L                                                                                    |
| ATMG00665        | NAD5B   | Mitochondrial NADH dehydrogenase subunit 5                                                                       |
| ATMG00270        | NAD6    | NADH dehydrogenase subunit 6                                                                                     |
| <b>ATMG00510</b> | NAD7    | NADH dehydrogenase subunit 7                                                                                     |
| <b>ATMG00070</b> | NAD9    | NADH dehydrogenase subunit 9                                                                                     |
| AT2G29990        | NDA2    | alternative NAD(P)H dehydrogenase 2 (NDA2)                                                                       |
| AT4G28220        | NDB1    | NAD(P)H dehydrogenase B1 (NDB1)                                                                                  |
| AT4G21490        | NDB3    | NAD(P)H dehydrogenase B3 (NDB3)                                                                                  |
| ATCG01100        | NDHA    | NADH dehydrogenase ND1                                                                                           |
| ATCG01250        | NDHB    | NADH dehydrogenase ND2                                                                                           |
| ATCG00440        | NDHC    | NADH dehydrogenase D3 subunit of the chloroplast NAD(P)H dehydrogenase complex                                   |
| ATCG01050        | NDHD    | Represents a plastid-encoded subunit of a NAD(P)H dehydrogenase complex                                          |
| ATCG01070        | NDHE    | NADH dehydrogenase ND4L                                                                                          |
| ATCG01010        | NDHF    | Chloroplast encoded NADH dehydrogenase unit                                                                      |
| ATCG01080        | NDHG    | NADH dehydrogenase ND6                                                                                           |
| ATCG01110        | NDHH    | the 49KDa plastid NAD(P)H dehydrogenase subunit H protein                                                        |
| ATCG01090        | NDHI    | subunit of the chloroplast NAD(P)H dehydrogenase complex                                                         |
| ATCG00420        | NDHJ    | NADH dehydrogenase subunit J                                                                                     |
| ATMG01330        | ORF107F | hypothetical protein                                                                                             |
| ATMG01260        | ORF205  | hypothetical protein                                                                                             |
| <b>ATMG00480</b> | ORFB    | subunit 8 of the mitochondrial F(O) ATP synthase complex                                                         |
| <b>ATCG00480</b> | PB      | chloroplast-encoded gene for beta subunit of ATP synthase                                                        |
| AT1G01050        | PPa1    | a soluble protein with inorganic pyrophosphatase activity that is highly specific for Mg-inorganic pyrophosphate |
| AT2G18230        | PPa2    | a protein that might have inorganic pyrophosphatase activity                                                     |
| AT2G46860        | PPa3    | a protein that might have inorganic pyrophosphatase activity                                                     |
| AT3G53620        | PPa4    | a soluble protein with inorganic pyrophosphatase activity that is highly specific for Mg-inorganic pyrophosphate |

|                  |        |                                                                                                                                      |
|------------------|--------|--------------------------------------------------------------------------------------------------------------------------------------|
| AT4G01480        | PPa5   | a protein that might have inorganic pyrophosphatase activity                                                                         |
| AT5G09650        | PPa6   | a protein with inorganic pyrophosphatase activity                                                                                    |
| ATCG00430        | PSBG   | its wheat homolog was later shown to encode for subunit K of NADH dehydrogenase                                                      |
| <b>AT5G66760</b> | SDH1-1 | One of two genes in Arabidopsis that encode a flavoprotein subunit of the mitochondrial succinate dehydrogenase complex              |
| <b>AT2G18450</b> | SDH1-2 | Nuclear encoded mitochondrial flavoprotein subunit of succinate dehydrogenase complex                                                |
| <b>AT3G27380</b> | SDH2-1 | One of three isoforms of the iron-sulfur component of the succinate dehydrogenase complex                                            |
| <b>AT5G40650</b> | SDH2-2 | One of three isoforms of the iron-sulfur component of the succinate dehydrogenase complex                                            |
| AT5G65165        | SDH2-3 | One of three isoforms of the iron-sulfur component of the succinate dehydrogenase complex                                            |
| AT4G11150        | TUF    | a vacuolar H <sup>+</sup> -ATPase subunit E isoform 1 which is required for Golgi organization and vacuole function in embryogenesis |
| AT4G23710        | VAG2   | vacuolar ATP synthase subunit G2 (VAG2)                                                                                              |
| AT4G25950        | VATG3  | V-ATPase G-subunit like protein                                                                                                      |
| <b>AT1G78900</b> | VHA-A  | catalytic subunit A of the vacuolar ATP synthase                                                                                     |
| AT2G28520        | VHA-A1 | Vacuolar proton ATPase subunit VHA-a isoform 1                                                                                       |
| <b>AT2G21410</b> | VHA-A2 | Vacuolar proton ATPase subunit VHA-a isoform 2                                                                                       |
| <b>AT4G39080</b> | VHA-A3 | Vacuolar proton ATPase subunit VHA-a isoform 3                                                                                       |
| AT4G38920        | VHA-C3 | vacuolar-type H <sup>(+)</sup> -ATPase C3 (VHA-C3)                                                                                   |
| AT3G08560        | VHA-E2 | vacuolar H <sup>+</sup> -ATPase subunit E isoform 2 (VHA-E2)                                                                         |
| AT1G64200        | VHA-E3 | vacuolar H <sup>+</sup> -ATPase subunit E isoform 3 (VHA-E3)                                                                         |
| AT1G16780        | VHP2   | a type II H <sup>+</sup> -Ppases                                                                                                     |
| AT3G01390        | VMA10  | Subunit G of the vacuolar membrane ATPase complex                                                                                    |
| <b>AT5G08690</b> |        | the mitochondrial ATP synthase beta-subunit                                                                                          |
| <b>AT4G38510</b> |        | ATPase, V1 complex, subunit B protein                                                                                                |
| <b>AT4G30190</b> |        | belongs to the P-type ATPase superfamily of cation-transporting ATPases, nutrients by proton symport                                 |
| <b>AT1G20260</b> |        | ATPase, V1 complex, subunit B protein                                                                                                |
| <b>AT5G47030</b> |        | the mitochondrial ATP synthase subunit delta                                                                                         |
| <b>AT5G40810</b> |        | Cytochrome C1 family                                                                                                                 |
| <b>AT5G13440</b> |        | Ubiquinol-cytochrome C reductase iron-sulfur subunit                                                                                 |
| <b>AT5G13430</b> |        | Ubiquinol-cytochrome C reductase iron-sulfur subunit                                                                                 |
| <b>AT5G11770</b> |        | NADH-ubiquinone oxidoreductase 20 kDa subunit, mitochondrial                                                                         |
| <b>AT5G08680</b> |        | the mitochondrial ATP synthase beta-subunit                                                                                          |
| <b>AT5G08670</b> |        | the mitochondrial ATP synthase beta-subunit                                                                                          |
| <b>AT4G29480</b> |        | Mitochondrial ATP synthase subunit G protein                                                                                         |
| <b>AT4G05020</b> |        | NAD(P)H dehydrogenase B2 (NDB2)                                                                                                      |
| <b>AT4G02580</b> |        | NADH-ubiquinone oxidoreductase 24 kDa subunit, putative                                                                              |
| <b>AT3G42050</b> |        | vacuolar ATP synthase subunit H family protein                                                                                       |
| <b>AT3G27240</b> |        | Cytochrome C1 family                                                                                                                 |
| <b>AT3G03100</b> |        | NADH:ubiquinone oxidoreductase, 17                                                                                                   |
| <b>AT2G20360</b> |        | NAD(P)-binding Rossmann-fold superfamily protein                                                                                     |
| <b>AT1G76030</b> |        | the vacuolar ATP synthase subunit B1                                                                                                 |
| AT1G02410        |        | cytochrome c oxidase assembly protein CtaG / Cox11 family                                                                            |

|           |                                                                                                      |
|-----------|------------------------------------------------------------------------------------------------------|
| AT1G15120 | Ubiquinol-cytochrome C reductase hinge protein                                                       |
| AT1G16700 | Alpha-helical ferredoxin                                                                             |
| AT1G32710 | Cytochrome c oxidase, subunit Vib family protein                                                     |
| AT1G49140 | Complex I subunit NDUFS6                                                                             |
| AT1G51650 | ATP synthase epsilon chain, mitochondrial                                                            |
| AT1G53030 | a copper chaperone, can functional complements the yeast COX17 null mutant                           |
| AT1G75630 | vacuolar H <sup>+</sup> -pumping ATPase 16 kD proteolipid (ava-p) mRNA,                              |
| AT1G79010 | Alpha-helical ferredoxin                                                                             |
| AT1G80230 | Rubredoxin-like superfamily protein                                                                  |
| AT2G01090 | Ubiquinol-cytochrome C reductase hinge protein                                                       |
| AT2G02050 | NADH-ubiquinone oxidoreductase B18 subunit, putative                                                 |
| AT2G07671 | ATP synthase subunit C family protein                                                                |
| AT2G07687 | Cytochrome c oxidase, subunit III                                                                    |
| AT2G07698 | ATPase, F1 complex, alpha subunit protein                                                            |
| AT2G07707 | Plant mitochondrial ATPase, F0 complex, subunit 8 protein                                            |
| AT2G07727 | Di-haem cytochrome, transmembrane                                                                    |
| AT2G07741 | ATPase, F0 complex, subunit A protein                                                                |
| AT2G07751 | NADH:ubiquinone/plastoquinone oxidoreductase, chain 3 protein                                        |
| AT2G07785 | NADH dehydrogenase family protein                                                                    |
| AT2G16510 | ATPase, F0/V0 complex, subunit C protein                                                             |
| AT2G19680 | Mitochondrial ATP synthase subunit G protein                                                         |
| AT2G25610 | ATPase, F0/V0 complex, subunit C protein                                                             |
| AT2G33220 | GRIM-19 protein                                                                                      |
| AT2G47690 | NADH-ubiquinone oxidoreductase-related                                                               |
| AT3G03070 | NADH-ubiquinone oxidoreductase-related                                                               |
| AT3G06310 | Cox19-like CHCH family protein                                                                       |
| AT3G08610 | unknown protein                                                                                      |
| AT3G12260 | LYR family of Fe/S cluster biogenesis protein                                                        |
| AT3G15640 | Rubredoxin-like superfamily protein                                                                  |
| AT3G18410 | Complex I subunit NDUFS6                                                                             |
| AT3G28710 | ATPase, V0/A0 complex, subunit C/D                                                                   |
| AT3G28715 | ATPase, V0/A0 complex, subunit C/D                                                                   |
| AT3G52730 | ubiquinol-cytochrome C reductase UQCRX/QCR9-like family protein                                      |
| AT3G58730 | vacuolar ATP synthase subunit D (VATD) / V-ATPase D subunit / vacuolar proton pump D subunit (VATPD) |
| AT3G62790 | NADH-ubiquinone oxidoreductase-related                                                               |
| AT4G02620 | vacuolar ATPase subunit F family protein                                                             |
| AT4G26210 | Mitochondrial ATP synthase subunit G protein                                                         |
| AT4G26710 | ATPase, V0 complex, subunit E                                                                        |
| AT4G28060 | Cytochrome c oxidase, subunit Vib family protein                                                     |
| AT4G32260 | ATPase, F0 complex, subunit B/B', bacterial/chloroplast                                              |



|           |                                                     |
|-----------|-----------------------------------------------------|
| AT4G32470 | Cytochrome bd ubiquinol oxidase, 14kDa subunit      |
| AT4G32530 | ATPase, F0/V0 complex, subunit C protein            |
| AT4G34700 | LYR family of Fe/S cluster biogenesis protein       |
| AT4G37830 | cytochrome c oxidase-related                        |
| AT5G18800 | Cox19-like CHCH family protein                      |
| AT5G25450 | Cytochrome bd ubiquinol oxidase, 14kDa subunit      |
| AT5G47890 | NADH-ubiquinone oxidoreductase B8 subunit, putative |
| AT5G52840 | NADH-ubiquinone oxidoreductase-related              |
| AT5G55290 | ATPase, V0 complex, subunit E                       |
| AT5G57815 | Cytochrome c oxidase, subunit Vib family protein    |

Table S4 Genes involved in the TCA cycle in Arabidopsis

Proteins in bold were identified in Zhao et al., 2008. Plant Cell. 20: 3210-32226

Proteins in italics were identified in Zhao et al., 2010 J. Proteome Res. 9: 1637–1647

Gene list was downloaded from KEGG

([http://www.genome.jp/kegg-bin/show\\_pathway?org\\_name=ath&mapno=00020&mapscale=1.0&show\\_description=show](http://www.genome.jp/kegg-bin/show_pathway?org_name=ath&mapno=00020&mapscale=1.0&show_description=show))

Gene name and description were downloaded from TAIR (<http://www.arabidopsis.org/>).

| TCA              | Name     | Description                                                                                                 |
|------------------|----------|-------------------------------------------------------------------------------------------------------------|
| AT1G60810        | ACLA-2   | One of the three genes encoding subunit A of the trimeric enzyme ATP Citrate lyase                          |
| AT1G09430        | ACLA-3   | subunit A of the heteromeric enzyme ATP citrate lyase (ACL)                                                 |
| <b>AT3G06650</b> | ACLB-1   | One of the two genes encoding subunit B of the trimeric enzyme ATP Citrate lyase                            |
| <b>AT5G49460</b> | ACLB-2   | One of the two genes encoding subunit B of the cytosolic enzyme ATP Citrate Lyase (ACL)                     |
| <b>AT4G35830</b> | ACO1     | an aconitase that can catalyze the conversion of citrate to isocitrate through a cis-aconitate intermediate |
| <b>AT4G26970</b> | ACO2     | an aconitase that can catalyze the conversion of citrate to isocitrate through a cis-aconitate intermediate |
| <b>AT2G05710</b> | ACO3     | an aconitase that can catalyze the conversion of citrate to isocitrate through a cis-aconitate intermediate |
| AT2G44350        | ATCS     | a mitochondrion targeted citrate synthase                                                                   |
| <b>AT1G65930</b> | ciCDH    | a NADP+-isocitrate dehydrogenase that is believed to function in the cytosol                                |
| AT3G58740        | CSY1     | a peroxisomal citrate synthase that is expressed in siliques and developing seeds                           |
| <b>AT3G58750</b> | CSY2     | a peroxisomal citrate synthase that is expressed throughout seedling and shoot development                  |
| AT2G42790        | CSY3     | a peroxisomal citrate synthase that is expressed throughout seedling and shoot development                  |
| AT3G60100        | CSY5     | citrate synthase 5 (CSY5)                                                                                   |
| <b>AT1G59900</b> | E1 ALPHA | the e1 alpha subunit of the pyruvate dehydrogenase complex (PDC)                                            |
| <b>AT1G34430</b> | EMB3003  | embryo defective 3003 (EMB3003)                                                                             |
| <b>AT2G47510</b> | FUM1     | a mitochondrial-localized protein                                                                           |
| <b>AT5G50950</b> | FUM2     | a fumarase enzyme                                                                                           |
| <b>AT1G24180</b> | IAR4     | Arabidopsis thaliana pyruvate dehydrogenase E1a-like subunit                                                |
| AT1G54340        | ICDH     | NADP-specific isocitrate dehydrogenase (ICDH)                                                               |
| <b>AT4G35260</b> | IDH1     | a regulatory subunit of the mitochondrially-localized NAD+- dependent isocitrate dehydrogenase              |
| <b>AT2G17130</b> | IDH2     | a regulatory subunit of the mitochondrially-localized NAD+- dependent isocitrate dehydrogenase              |
| AT4G35650        | IDH-III  | a regulatory subunit of the mitochondrially-localized NAD+- dependent isocitrate dehydrogenase              |
| AT1G32480        | IDH-IV   | Predicted to encode a protein related isocitrate dehydrogenases                                             |
| AT5G03290        | IDH-V    | a catalytic subunit of the mitochondrially-localized NAD+- dependent isocitrate dehydrogenase               |
| AT3G09810        | IDH-VI   | a catalytic subunit of the mitochondrially-localized NAD+- dependent isocitrate dehydrogenase               |
| AT3G16950        | LPD1     | a plastid lipoamide dehydrogenase                                                                           |
| <b>AT5G50850</b> | MAB1     | MACCI-BOU (MAB1)                                                                                            |
| <b>AT3G47520</b> | MDH      | a protein with NAD-dependent malate dehydrogenase activity, located in chloroplasts                         |
| <b>AT1G53240</b> | mMDH1    | Lactate/malate dehydrogenase family protein                                                                 |
| <b>AT3G15020</b> | mMDH2    | Lactate/malate dehydrogenase family protein                                                                 |
| <b>AT1G48030</b> | mtLPD1   | a mitochondrial lipoamide dehydrogenase whose expression is induced by light                                |

**AT3G17240** mtLPD2 lipoamide dehydrogenase precursor  
**AT4G37870** PCK1 a putative phosphoenolpyruvate carboxykinase (ATP-dependent)  
AT5G65690 PCK2 a putative phosphoenolpyruvate carboxykinase (ATP-dependent)  
**AT1G01090** PDH-E1 AL pyruvate dehydrogenase E1 alpha subunit  
**AT1G30120** PDH-E1 BE a putative plastid pyruvate dehydrogenase E1 beta subunit  
AT2G22780 PMDH1 an peroxisomal NAD-malate dehydrogenase  
**AT5G09660** PMDH2 a microbody NAD-dependent malate dehydrogenase  
**AT5G66760** SDH1-1 One of two genes in Arabidopsis that encode a flavoprotein subunit of the mitochondrial succinate dehydrogenase complex  
**AT2G18450** SDH1-2 Nuclear encoded mitochondrial flavoprotein subunit of succinate dehydrogenase complex  
**AT3G27380** SDH2-1 One of three isoforms of the iron-sulfur component of the succinate dehydrogenase complex  
**AT5G40650** SDH2-2 One of three isoforms of the iron-sulfur component of the succinate dehydrogenase complex  
AT5G65165 SDH2-3 One of three isoforms of the iron-sulfur component of the succinate dehydrogenase complex  
**AT5G65750** 2-oxoglutarate dehydrogenase, E1 component  
**AT5G43330** Lactate/malate dehydrogenase family protein  
AT5G23250 Succinyl-CoA ligase, alpha subunit  
**AT5G08300** Succinyl-CoA ligase, alpha subunit  
**AT3G55410** 2-oxoglutarate dehydrogenase, E1 component  
**AT3G13930** Dihydrolipoamide acetyltransferase, long form protein  
**AT1G04410** Lactate/malate dehydrogenase family protein  
**AT5G55070** Dihydrolipoamide succinyltransferase  
**AT4G26910** Dihydrolipoamide succinyltransferase  
**AT4G16155** dihydrolipoamide dehydrogenases  
**AT3G52200** dihydrolipoamide S-acetyltransferase (LTA3) mRNA, nuclear  
**AT2G20420** ATP citrate lyase (ACL) family protein  
**AT1G10670** One of the three genes encoding subunit A of the trimeric protein ATP Citrate Lyase  
AT1G54220 Dihydrolipoamide acetyltransferase, long form protein  
AT2G34590 Transketolase family protein  
AT5G14590 Isocitrate/isopropylmalate dehydrogenase family protein  
AT5G56720 Lactate/malate dehydrogenase family protein

Table S5 Genes involved in the Calvin cycle in Arabidopsis

Proteins in bold were identified in Zhao et al., 2008. Plant Cell. 20: 3210-32226

Proteins in italics were identified in Zhao et al., 2010 J. Proteome Res. 9: 1637–1647

Gene list was downloaded from KEGG

([http://www.genome.jp/kegg-bin/show\\_pathway?org\\_name=ath&mapno=00710&mapscale=&show\\_description=hide](http://www.genome.jp/kegg-bin/show_pathway?org_name=ath&mapno=00710&mapscale=&show_description=hide))

Gene name and description were downloaded from TAIR (<http://www.arabidopsis.org/>).

| Calvin Cycle | Name             | Description                                                                                                                         |
|--------------|------------------|-------------------------------------------------------------------------------------------------------------------------------------|
|              | <b>AT1G17290</b> | AlaAT1 for alanine aminotransferase (ALAAT1), involved in alanine catabolism during plants recovery from hypoxia                    |
|              | <b>AT1G70580</b> | AOAT2 a protein with glyoxylate aminotransferase activity                                                                           |
|              | <b>AT5G19550</b> | ASP2 Nitrogen metabolism                                                                                                            |
|              | AT5G11520        | ASP3 the chloroplastic isozyme of aspartate aminotransferase                                                                        |
|              | AT1G62800        | ASP4 aspartate aminotransferase (Asp4)                                                                                              |
|              | <b>AT4G31990</b> | ASP5 a plastid-localized aspartate aminotransferase                                                                                 |
|              | <b>AT2G21330</b> | FBA1 fructose-bisphosphate aldolase 1 (FBA1)                                                                                        |
|              | <b>AT4G38970</b> | FBA2 Protein is tyrosine-phosphorylated and its phosphorylation state is modulated in response to ABA in Arabidopsis thaliana seeds |
|              | <b>AT3G26650</b> | GAPA one of the two subunits forming the photosynthetic glyceraldehyde-3-phosphate dehydrogenase (GAPDH)                            |
|              | <b>AT1G12900</b> | GAPA-2 glyceraldehyde 3-phosphate dehydrogenase A subunit 2 (GAPA-2)                                                                |
|              | <b>AT1G42970</b> | GAPB chloroplast localized glyceraldehyde-3-phosphate dehydrogenase                                                                 |
|              | <b>AT1G23310</b> | GGT1 Identified by cloning the gene that corresponded to a purified protein having glyoxylate aminotransferase activity             |
|              | <b>AT3G54050</b> | HCEF1 HCEF1 (High Cyclic Electron Flow 1)                                                                                           |
|              | <b>AT3G47520</b> | MDH a protein with NAD-dependent malate dehydrogenase activity, located in chloroplasts                                             |
|              | <b>AT1G53240</b> | mMDH1 Lactate/malate dehydrogenase family protein                                                                                   |
|              | <b>AT3G15020</b> | mMDH2 Lactate/malate dehydrogenase family protein                                                                                   |
|              | <b>AT2G13560</b> | NAD-ME1 an NAD-dependent malic enzyme (NAD-ME) that does not act on oxaloacetate                                                    |
|              | <b>AT4G00570</b> | NAD-ME2 an NAD-dependent malic enzyme (NAD-ME) that does not act on oxaloacetate                                                    |
|              | AT2G19900        | NADP-ME1 The malic enzyme (EC 1)                                                                                                    |
|              | <b>AT5G11670</b> | NADP-ME2 The malic enzyme (EC 1)                                                                                                    |
|              | AT5G25880        | NADP-ME3 The malic enzyme (EC 1)                                                                                                    |
|              | AT1G79750        | NADP-ME4 The malic enzyme (EC 1)                                                                                                    |
|              | <b>AT4G37870</b> | PCK1 a putative phosphoenolpyruvate carboxykinase (ATP-dependent)                                                                   |
|              | AT5G65690        | PCK2 a putative phosphoenolpyruvate carboxykinase (ATP-dependent)                                                                   |
|              | <b>AT1G79550</b> | PGK cytosolic phosphoglycerate kinase (PGK)                                                                                         |
|              | AT3G12780        | PGK1 nuclear phosphoglycerate kinase (PGK1)                                                                                         |
|              | AT1G32440        | PKp3 a chloroplast pyruvate kinase beta subunit                                                                                     |
|              | <b>AT3G22960</b> | PKP-ALPHA a chloroplast pyruvate kinase alpha subunit                                                                               |
|              | <b>AT5G52920</b> | PKP-BETA1 a dominant chloroplast pyruvate kinase beta subunit                                                                       |
|              | AT2G22780        | PMDH1 an peroxisomal NAD-malate dehydrogenase                                                                                       |
|              | <b>AT5G09660</b> | PMDH2 a microbody NAD-dependent malate dehydrogenase                                                                                |

|                  |        |                                                                                                                        |
|------------------|--------|------------------------------------------------------------------------------------------------------------------------|
| <b>AT1G53310</b> | PPC1   | one of four Arabidopsis phosphoenolpyruvate carboxylase proteins                                                       |
| <b>AT2G42600</b> | PPC2   | one of four Arabidopsis phosphoenolpyruvate carboxylase proteins                                                       |
| AT3G14940        | PPC3   | a cytosolic phosphoenolpyruvate carboxylase (PEPC) that has activity when expressed in E                               |
| AT1G68750        | PPC4   | one of four Arabidopsis phosphoenolpyruvate (PEP) carboxylase proteins                                                 |
| AT4G15530        | PPDK   | a dual-targeted protein believed to act as a pyruvate, orthophosphate dikinase                                         |
| <b>AT1G32060</b> | PRK    | phosphoribulokinase (PRK)                                                                                              |
| <b>ATCG00490</b> | RBCL   | large subunit of RUBISCO                                                                                               |
| <b>AT1G67090</b> | RBCS1A | ribulose biphosphate carboxylase small chain 1A (RBCS1A)                                                               |
| AT5G61410        | RPE    | Arabidopsis thaliana ribulose-5-phosphate-3-epimerase mRNA                                                             |
| AT2G01290        | RPI2   | Cytosolic ribose-5-phosphate isomerase                                                                                 |
| AT1G71100        | RSW10  | a ribose 5-phosphate isomerase involved in the formation of uridine used for the synthesis of UDP-sugars               |
| <b>AT3G55800</b> | SBPASE | the chloroplast enzyme sedoheptulose-1,7-bisphosphatase (SBPase), involved in the carbon reduction of the Calvin cycle |
| <b>AT2G21170</b> | TIM    | a plastidic triose phosphate isomerase                                                                                 |
| <b>AT3G55440</b> | TPI    | triosephosphate isomerase                                                                                              |
| <b>AT5G43330</b> |        | Lactate/malate dehydrogenase family protein                                                                            |
| <b>AT5G38420</b> |        | Ribulose biphosphate carboxylase (small chain) family protein                                                          |
| <b>AT5G38410</b> |        | Ribulose biphosphate carboxylase (small chain) family protein                                                          |
| <b>AT3G60750</b> |        | Transketolase                                                                                                          |
| <b>AT3G52930</b> |        | Aldolase superfamily protein                                                                                           |
| <b>AT2G36580</b> |        | Pyruvate kinase family protein                                                                                         |
| <b>AT2G01140</b> |        | Aldolase superfamily protein                                                                                           |
| <b>AT1G04410</b> |        | Lactate/malate dehydrogenase family protein                                                                            |
| <b>AT5G38430</b> |        | Ribulose biphosphate carboxylase (small chain) family protein                                                          |
| <b>AT3G52990</b> |        | Pyruvate kinase family protein                                                                                         |
| <b>AT3G04790</b> |        | Ribose 5-phosphate isomerase, type A protein                                                                           |
| <b>AT2G45290</b> |        | Transketolase                                                                                                          |
| <b>AT2G36460</b> |        | Aldolase superfamily protein                                                                                           |
| <b>AT1G56190</b> |        | Phosphoglycerate kinase family protein                                                                                 |
| <b>AT1G43670</b> |        | Inositol monophosphatase family protein                                                                                |
| AT1G63290        |        | Aldolase-type TIM barrel family protein                                                                                |
| AT1G72330        |        | for alanine aminotransferase ALAAT2                                                                                    |
| AT3G01850        |        | Aldolase-type TIM barrel family protein                                                                                |
| AT3G04050        |        | Pyruvate kinase family protein                                                                                         |
| AT3G25960        |        | Pyruvate kinase family protein                                                                                         |
| AT3G49160        |        | Expression of the gene is downregulated in the presence of paraquat, an inducer of photooxidative stress               |
| AT3G55650        |        | Pyruvate kinase family protein                                                                                         |
| AT3G55810        |        | Pyruvate kinase family protein                                                                                         |
| AT4G26390        |        | Pyruvate kinase family protein                                                                                         |
| AT4G26520        |        | Aldolase superfamily protein                                                                                           |
| AT4G26530        |        | Aldolase superfamily protein                                                                                           |

|           |                                                    |
|-----------|----------------------------------------------------|
| AT5G03690 | Aldolase superfamily protein                       |
| AT5G08570 | Pyruvate kinase family protein                     |
| AT5G44520 | NagB/RpiA/CoA transferase-like superfamily protein |
| AT5G56350 | Pyruvate kinase family protein                     |
| AT5G56720 | Lactate/malate dehydrogenase family protein        |
| AT5G63680 | Pyruvate kinase family protein                     |
| AT5G64380 | Inositol monophosphatase family protein            |
